# Supplementary material for: Influence of adiposity and fatigue on the scapular muscle recruitment order
Source: PeerJ. 2019 Jun 25;7:e7175. doi: 10.7717/peerj.7175 (PMC6598653; doi:10.7717/peerj.7175)
Supplement: Supplemental Information 1 — Raw data exported from the anthropometric and surface electromyographic evaluations applied for data analyses and preparation for Fig. 1, Tables 1–3. [file peerj-07-7175-s001.xlsx]

## Sheet: Hoja1
	ID	Age (años	Height (m)	Peso (Kg)	IMC (Kg/m2)	CLAS IMC	Axillay	Pectoral	Tricipital	Subscapular	Ileocrestal	Abdominal	Anterior Thigh	Body density (Jackson & Pollock)	%Body Fat Siri (Jackson & Pollock)	Upper Trapezius (ms)	Middle Trapezius (ms)	Lower Trapezius (ms)	Serratus Anterior (ms)
No-Fatigue	1	22	1.63	75.8	28.5295	S/O	19	14.5	14	23	24.6667	27.6667	14.6667	1.05625	18.641	-75.56	-152.78	-81.88	-123.01
	2	22	1.69	67	23.4586	N	12.7	10.6667	12	21	23.6667	20.6667	11	1.06393	15.2552	-78.92	-54.15	-117.37	-19.39
	4	24	1.78	82	25.9	S/O	16.3333	15.6667	12.3333	24	29	26.3333	15.3333	1.05524	19.0855	-38.48	-158.31	-76.67	-31.15
	5	22	1.69	87.5	30.6362	S/O	14.7	12.9	16	21.3	26.7	31	17	1.05565	18.9045	-75.72	-143.8	-86.8	-68.08
	7	20	1.76	77	24.858	N	16.3	16	22	20	26	30.1	19.7	1.05333	19.9363	26.76	-100.12	-69.14	-58.35
	8	23	1.72	76	25.7	S/O	19.5	13.5	16.3333	20.3	28.3333	24	18.6667	1.05507	19.1615	-28.9	39.33	29.07	-95.03
	9	21	1.66	74	26.8544	S/O	21.7	20.3333	22.6667	25.3	35.3333	33.6667	19.3333	1.04586	23.2925	-35.33	-84.76	-11.13	-40.23
	10	22	1.76	77.1	24.8902	N	16.7	11.3333	15.7	23	23.6667	26.1	12	1.05884	17.491	16.9	-19.44	24.25	-94.47
	11	25	1.71	76.7	26.2303	S/O	16.7	19.3333	15	23.7	27	30	20	1.05145	20.7768	-8.55	-53.6	-90.5	-80.39
	13	24	1.72	82.5	27.8867	S/O	15	11.3333	14.3333	19.3	28	25.7	14.6667	1.05832	17.7241	-56.78	-135.6	-90.46	-112.678
	14	22	1.84	81	23.9249	N	10.4	15	17.6667	19	27.6667	26	16.6667	1.05771	17.9935	-65.95	-54.12	-101.02	-155.82
	15	20	1.78	71.6	22.5982	N	14.3	12	16	18.5	32.6667	23	16.3333	1.05817	17.7897	-63.84	-94.73	-70.04	-120.3
	17	22	1.78	67	21.1463	N	14	13	8	18.7	11.6667	10	7.66667	1.07333	11.1809	-48.33	-57.1	-99.583	-103.08
	18	23	1.69	76	26.6097	S/O	15	10.6667	12.3333	24	28.3333	26.6667	11.6667	1.05851	17.64	-28.64	-150.432	-65.23	-36.64
	19	22	1.79	75	23.4075	N	15.6667	9	12.6667	24.7	29.3333	22.6667	10.6667	1.05997	16.9954	-68.95	-76.7	-30.25	-34.21
	20	22	1.75	73.9	24.1306	N	16.6667	10.3333	15	24	25	25.6667	17.6667	1.05715	18.2402	12.46	-75.8	-96.4	-57.35
	22	21	1.86	79	22.835	N	12.3333	11	15	21	17.3333	19	15.6667	1.06433	15.0791	12.54	-24.82	-114.72	-19.58
Fatigue	2	23	1.71	67.9	23.2208	N	11.7	11	16.6667	19.3	20.6667	26	13	1.0616	16.2783	-85.93	-42.61	15.67	-23.6
	3	20	1.86	65.2	18.84	N	12.3	9	10.6667	19	15	16.3333	15.6667	1.0689	13.0934	53.98	6.77	14.2	-12.07
	5	21	1.85	94	27.4653	S/O	21.3	16	15	26.7	35	34.3333	15	1.04957	21.6213	-25.56	53.26	37.4	53.26
	6	22	1.7	63.9	22.1107	N	18.7	17.3333	16.6667	23.7	27.3333	22	20	1.05395	19.6632	26.98	56.81	62.5	35.3
	7	23	1.72	80	27	S/O	22.5	16.3	15	25	32.3	34.3333	14	1.05	21.4292	-78.31	56.43	50.21	61.83
	9	25	1.72	90	30.4218	S/O	22.5	15	12	30.3	28.6667	24.6667	13.3333	1.05288	20.1387	-77.81	89.55	34.8	99.65
	10	21	1.82	87	26.3	S/O	19.3	15.7	19.6667	28	34.3333	34	25.3333	1.04634	23.0755	-48.67	63.48	45.6	99.6
	12	22	1.74	70	23.1	N	12.7	10.6667	14.3333	18.3	20.6667	20.3333	15.3333	1.06373	15.3416	-90.3	-43.32	-13.5	-19.5
	14	20	1.7	64.5	22.3183	N	14.3	10	14.6667	21.7	21	21.6667	11.3333	1.06359	15.406	-36.93	11.5	-5.68	2.84
	15	23	1.74	70.5	23.2858	N	13.3	8.33333	10	19.3	26.6667	24.6667	11.3333	1.06305	15.6401	-19.88	43.32	-26.4	-15.62
	16	22	1.84	85.2	25.1654	S/O	19.5	13	18.3333	24.3	22.3333	19.3333	15.3333	1.05778	17.9594	-49.71	26.27	61.07	50.42
	17	20	1.75	110.8	36.1796	S/O	23.7	19	22	33	28.3333	30	18.6667	1.04703	22.7667	-114.91	26.98	34.9	125.56
	18	23	1.67	67	24	S/O	20.3	18.5	15.6667	25	25.3333	32	15.6667	1.05183	20.6066	-25.56	74.57	18.46	98.72
	19	22	1.67	60.4	21.6573	N	10	9.33333	6.66667	18.7	15.6667	9.66667	9.66667	1.07448	10.6866	-77.73	78.12	6.3	5.56
	20	26	1.67	66	23.7	N	20.5	16	12.3333	24	24.3333	27	19	1.0535	19.8613	-63.21	76.7	3.6	78.81
	21	23	1.77	84	26.8122	S/O	19.3	13.7	15.6667	29	24.3	32	15.6667	1.0526	20.2661	-45.45	67.1	56.4	67.32
	22	30	1.76	81	26.1493	S/O	19	14	12	23	26.6667	26.3333	10	1.05581	18.8357	-66.97	11.94	25.6	71.48
	S/O	overweight/obesity
	N	normoweight
